# Supplementary material
Source: HighWire-hosted journal article supplement (https://bmjopen.bmj.com/content/10/3/e030823)
Supplement: inline-supplementary-material-1 [file inline-supplementary-material-1.pdf]

**A survey on Knowledge, Attitudes and Practice about antibiotic prescribing and resistance among medical practitioners in Kenyan local hospitals.**

Thank you very much for accepting to participate in this study.

**\*You are kindly requested to answer the questionnaire honestly and completely independent of cross-consultations and/or verifications.**

---

**Survey quality control**

Date of interview: ..... Start time..... End time.....

Interviewed by: .....Approved.....

Name of the Hospital..... Respondent's code.....

| QUESTIONS                                                                                                                                                                                         | ANSWERS                                                                                                                                                                                                                                                                                                                                                                                                                    |
|---------------------------------------------------------------------------------------------------------------------------------------------------------------------------------------------------|----------------------------------------------------------------------------------------------------------------------------------------------------------------------------------------------------------------------------------------------------------------------------------------------------------------------------------------------------------------------------------------------------------------------------|
| <b>PART 1: GENERAL QUESTIONS</b>                                                                                                                                                                  |                                                                                                                                                                                                                                                                                                                                                                                                                            |
| 1. <i>For how many years, since you graduated from medical school /medical training College, have you been working in a hospital (indicate cumulative years if worked in different hospitals)</i> | <ul style="list-style-type: none"> <li>❖ <i>I am on attachment</i></li> <li>❖ <i>I am a trainee in medicine (internship)</i></li> <li>❖ <i>Less than one year</i></li> <li>❖ <i>1-3 years</i></li> <li>❖ <i>4 – 6 years</i></li> <li>❖ <i>7 years and more</i></li> </ul>                                                                                                                                                  |
| 2. <i>In which department do you work?</i>                                                                                                                                                        | <ul style="list-style-type: none"> <li><input type="radio"/> <i>Medicine /Emergency</i></li> <li><input type="radio"/> <i>Surgery</i></li> <li><input type="radio"/> <i>Paediatrics</i></li> <li><input type="radio"/> <i>Obstetrics and Gynaecology</i></li> <li><input type="radio"/> <i>Outpatient/A/E</i></li> <li><input type="radio"/> <i>Pharmacy</i></li> <li><input type="radio"/> <i>Other: .....</i></li> </ul> |
| 3. <i>Designation (e.g. Consultant, Pharmacist, Nurse, etc.)</i>                                                                                                                                  | .....                                                                                                                                                                                                                                                                                                                                                                                                                      |
| <b>PART 2: PRESCRIPTION PATTERN (PRACTICE)</b>                                                                                                                                                    |                                                                                                                                                                                                                                                                                                                                                                                                                            |
| 4. <i>How frequently do you prescribe antibiotics?</i>                                                                                                                                            | <ul style="list-style-type: none"> <li>❖ <i>More than once daily</i></li> <li>❖ <i>Once daily</i></li> <li>❖ <i>3 – 5 times a week</i></li> <li>❖ <i>1 – 2 times a week</i></li> </ul>                                                                                                                                                                                                                                     |

|                                                                                                       |                                                                                                                                                                                                                     |
|-------------------------------------------------------------------------------------------------------|---------------------------------------------------------------------------------------------------------------------------------------------------------------------------------------------------------------------|
|                                                                                                       | ❖ <i>less than once a week)</i>                                                                                                                                                                                     |
| 5. <i>To whom do you prescribe?</i>                                                                   | <ul style="list-style-type: none"> <li>❖ <i>Patients at outpatient department</i></li> <li>❖ <i>Hospitalized patients</i></li> <li>❖ <i>Patients in out-patient department and hospitalised patients</i></li> </ul> |
| 6. <i>Do you follow any antibiotic prescription guidelines?</i>                                       | <ul style="list-style-type: none"> <li>❖ <i>Yes</i></li> <li>❖ <i>No</i></li> </ul>                                                                                                                                 |
| <b>PART 3: AWARENESS AND ATTITUDE ON THE CURRENT SCOPE OF ANTIBIOTIC RESISTANCE</b>                   |                                                                                                                                                                                                                     |
| 7. <i>Antibiotic resistance is a world-wide problem</i>                                               | <ul style="list-style-type: none"> <li>❖ <i>I strongly agree</i></li> <li>❖ <i>I agree</i></li> <li>❖ <i>Neutral</i></li> <li>❖ <i>I disagree</i></li> <li>❖ <i>I strongly disagree</i></li> </ul>                  |
| 8. <i>Antibiotic resistance is a problem in my country</i>                                            | <ul style="list-style-type: none"> <li>❖ <i>I strongly agree</i></li> <li>❖ <i>I agree</i></li> <li>❖ <i>Neutral</i></li> <li>❖ <i>I disagree</i></li> <li>❖ <i>I strongly disagree</i></li> </ul>                  |
| 9. <i>Antibiotic resistance is a problem in my hospital</i>                                           | <ul style="list-style-type: none"> <li>❖ <i>I strongly agree</i></li> <li>❖ <i>I agree</i></li> <li>❖ <i>Neutral</i></li> <li>❖ <i>I disagree</i></li> <li>❖ <i>I strongly disagree</i></li> </ul>                  |
| 10. <i>Antibiotics are overused in my hospital and in other hospitals of my country Kenya</i>         | <ul style="list-style-type: none"> <li>❖ <i>I strongly agree</i></li> <li>❖ <i>I agree</i></li> <li>❖ <i>Neutral</i></li> <li>❖ <i>I disagree</i></li> <li>❖ <i>I strongly disagree</i></li> </ul>                  |
| 11. <i>Patients' demands for antibiotics contribute to the overuse of antibiotics in the hospital</i> | <ul style="list-style-type: none"> <li>❖ <i>I strongly agree</i></li> <li>❖ <i>I agree</i></li> <li>❖ <i>Neutral</i></li> </ul>                                                                                     |

|                                                                                                                             |                                                                                                                                                                                                                          |
|-----------------------------------------------------------------------------------------------------------------------------|--------------------------------------------------------------------------------------------------------------------------------------------------------------------------------------------------------------------------|
|                                                                                                                             | <ul style="list-style-type: none"> <li>❖ <i>I disagree</i></li> <li>❖ <i>I strongly disagree</i></li> </ul>                                                                                                              |
| 12. <i>I think over-the-counter (OTC) medicines contribute to antibiotic misuse and subsequent antibiotic resistance</i>    | <ul style="list-style-type: none"> <li>❖ <i>I strongly agree</i></li> <li>❖ <i>I agree</i></li> <li>❖ <i>Neutral</i></li> <li>❖ <i>I disagree</i></li> <li>❖ <i>I strongly disagree</i></li> </ul>                       |
| 13. <i>My awareness on local antibiotic resistance pattern is?</i>                                                          | <ul style="list-style-type: none"> <li>❖ <i>Excellent</i></li> <li>❖ <i>Good</i></li> <li>❖ <i>Average</i></li> <li>❖ <i>Very little</i></li> <li>❖ <i>None</i></li> </ul>                                               |
| <b>PART 4: CHOICE OF ANTIBIOTIC</b>                                                                                         |                                                                                                                                                                                                                          |
| 14. <i>How confident are you about your knowledge of antibiotics?</i>                                                       | <ul style="list-style-type: none"> <li>❖ <i>Very confident</i></li> <li>❖ <i>Confident</i></li> <li>❖ <i>A bit confident</i></li> <li>❖ <i>Neutral/ I have no idea</i></li> <li>❖ <i>Not confident at all</i></li> </ul> |
| 15. <i>What is your confidence level in prescribing antibiotics</i>                                                         | <ul style="list-style-type: none"> <li>❖ <i>Very confident</i></li> <li>❖ <i>Confident</i></li> <li>❖ <i>A bit confident</i></li> <li>❖ <i>Neutral/ I have no idea</i></li> <li>❖ <i>Not confident at all</i></li> </ul> |
| 16. <i>How often do you check your decisions on antibiotic prescribing with a colleague?</i>                                | <ul style="list-style-type: none"> <li>❖ <i>Never</i></li> <li>❖ <i>Sometimes</i></li> <li>❖ <i>Half of the times</i></li> <li>❖ <i>Mostly</i></li> <li>❖ <i>Always</i></li> </ul>                                       |
| 17. <i>If you do consult a senior colleague, how frequent does he/she recommend prescription of a different antibiotic?</i> | <ul style="list-style-type: none"> <li>❖ <i>Never</i></li> <li>❖ <i>Sometimes</i></li> <li>❖ <i>Half of the times</i></li> </ul>                                                                                         |

|                                                                                                                          |                                                                                                                                                                                    |
|--------------------------------------------------------------------------------------------------------------------------|------------------------------------------------------------------------------------------------------------------------------------------------------------------------------------|
|                                                                                                                          | <ul style="list-style-type: none"> <li>❖ <i>Mostly</i></li> <li>❖ <i>Always</i></li> </ul>                                                                                         |
| 18. <i>How often do you depend on antibiotic sensitivity data from the laboratory to vary your prescription</i>          | <ul style="list-style-type: none"> <li>❖ <i>Never</i></li> <li>❖ <i>Sometimes</i></li> <li>❖ <i>Half of the times</i></li> <li>❖ <i>Mostly</i></li> <li>❖ <i>Always</i></li> </ul> |
| <b>PART 5: SOURCE OF INFORMATION ON ANTIBIOTICS PRESCRIBING AND RESISTANCE</b>                                           |                                                                                                                                                                                    |
| 19. <i>During the past years, how many courses or trainings did you receive relating to antibiotics?</i>                 | <ul style="list-style-type: none"> <li>❖ <i>0</i></li> <li>❖ <i>1-3</i></li> <li>❖ <i>4-6</i></li> <li>❖ <i>6-10</i></li> <li>❖ <i>&gt;10</i></li> </ul>                           |
| 20. <i>Among the sources of information about antibiotics listed below, which one did you consult in the last month?</i> |                                                                                                                                                                                    |
| ▪ <i>Information supplied by pharmaceutical companies</i>                                                                | <ul style="list-style-type: none"> <li>❖ <i>Yes</i></li> <li>❖ <i>No</i></li> </ul>                                                                                                |
| ▪ <i>Knowledge from training institutions</i>                                                                            | <ul style="list-style-type: none"> <li>❖ <i>Yes</i></li> <li>❖ <i>No</i></li> </ul>                                                                                                |
| ▪ <i>Internet</i>                                                                                                        | <ul style="list-style-type: none"> <li>❖ <i>Yes</i></li> <li>❖ <i>No</i></li> </ul>                                                                                                |
| ▪ <i>National guideline for empiric antimicrobial therapy</i>                                                            | <ul style="list-style-type: none"> <li>❖ <i>Yes</i></li> <li>❖ <i>No</i></li> </ul>                                                                                                |
| ▪ <i>The World Health Organization's (WHO) guidelines for treatment of bacterial diseases</i>                            | <ul style="list-style-type: none"> <li>❖ <i>Yes</i></li> <li>❖ <i>No</i></li> </ul>                                                                                                |
| 21. <i>How do you appreciate the sources of information about antibiotics listed below?</i>                              |                                                                                                                                                                                    |
| ▪ <i>Information supplied by pharmaceutical companies</i>                                                                | <ul style="list-style-type: none"> <li>❖ <i>Very useful</i></li> <li>❖ <i>Useful</i></li> <li>❖ <i>Not at all useful</i></li> <li>❖ <i>I do not know</i></li> </ul>                |

|                                                                                                                                         |                                                                                                                          |
|-----------------------------------------------------------------------------------------------------------------------------------------|--------------------------------------------------------------------------------------------------------------------------|
| ▪ <i>Information from University courses</i>                                                                                            | ❖ <i>Very useful</i><br>❖ <i>Useful</i><br>❖ <i>Not at all useful</i><br>❖ <i>I do not know</i>                          |
| ▪ <i>Internet</i>                                                                                                                       | ❖ <i>Very useful</i><br>❖ <i>Useful</i><br>❖ <i>Not at all useful</i><br>❖ <i>I do not know</i>                          |
| ▪ <i>National guideline for empiric antimicrobial therapy</i>                                                                           | ❖ <i>Very useful</i><br>❖ <i>Useful</i><br>❖ <i>Not at all useful</i><br>❖ <i>I do not know</i>                          |
| ▪ <i>The World Health Organization's (WHO) guidelines for treatment of bacterial diseases</i>                                           | ❖ <i>Very useful</i><br>❖ <i>Useful</i><br>❖ <i>Not at all useful</i><br>❖ <i>I do not know</i>                          |
| ▪ <i>Does your facility have a frequently released antibiogram?</i>                                                                     | ❖ <i>Yes</i><br>❖ <i>No</i>                                                                                              |
| ▪ <i>If yes, how useful is the antibiogram to you</i>                                                                                   | ❖ <i>Very useful</i><br>❖ <i>Useful</i><br>❖ <i>Not at all useful</i><br>❖ <i>I do not know</i>                          |
| <b>PART 6: DECISION ABOUT ANTIBIOTIC PRESCRIBING</b>                                                                                    |                                                                                                                          |
| 22. <i>When one prescribes an antibiotic, it is important to know the resistance pattern of the bacteria in the local setting</i>       | ❖ <i>I strongly agree</i><br>❖ <i>I agree</i><br>❖ <i>Neutral</i><br>❖ <i>I disagree</i><br>❖ <i>I strongly disagree</i> |
| 23. <i>My choice of prescribing antibiotic is more influenced by the availability of antibiotics than by the cause of the infection</i> | ❖ <i>I strongly agree</i><br>❖ <i>I agree</i><br>❖ <i>Neutral</i>                                                        |

|                                                                                                                                                                            |                                                                                                                                                                                                    |
|----------------------------------------------------------------------------------------------------------------------------------------------------------------------------|----------------------------------------------------------------------------------------------------------------------------------------------------------------------------------------------------|
|                                                                                                                                                                            | <ul style="list-style-type: none"> <li>❖ <i>I disagree</i></li> <li>❖ <i>I strongly disagree</i></li> </ul>                                                                                        |
| 24. <i>My choice of prescribing antibiotic is more influenced by the cost of the drug to the patient</i>                                                                   | <ul style="list-style-type: none"> <li>❖ <i>I strongly agree</i></li> <li>❖ <i>I agree</i></li> <li>❖ <i>Neutral</i></li> <li>❖ <i>I disagree</i></li> <li>❖ <i>I strongly disagree</i></li> </ul> |
| 25. <i>I'm always concerned about effectiveness and quality of an antibiotic when making my prescribing decisions</i>                                                      | <ul style="list-style-type: none"> <li>❖ <i>I strongly agree</i></li> <li>❖ <i>I agree</i></li> <li>❖ <i>Neutral</i></li> <li>❖ <i>I disagree</i></li> <li>❖ <i>I strongly disagree</i></li> </ul> |
| 26. <i>In regard to antibiotic guidelines, local guidelines are more useful than international guidelines</i>                                                              | <ul style="list-style-type: none"> <li>❖ <i>I strongly agree</i></li> <li>❖ <i>I agree</i></li> <li>❖ <i>Neutral</i></li> <li>❖ <i>I disagree</i></li> <li>❖ <i>I strongly disagree</i></li> </ul> |
| 27. <i>Antibiotic guidelines and antibiotic committees are rather obstacles than a help</i>                                                                                | <ul style="list-style-type: none"> <li>❖ <i>I strongly agree</i></li> <li>❖ <i>I agree</i></li> <li>❖ <i>Neutral</i></li> <li>❖ <i>I disagree</i></li> <li>❖ <i>I strongly disagree</i></li> </ul> |
| 28. <i>I welcome the implementation of a training program about antibiotics</i>                                                                                            | <ul style="list-style-type: none"> <li>❖ <i>I strongly agree</i></li> <li>❖ <i>I agree</i></li> <li>❖ <i>Neutral</i></li> <li>❖ <i>I disagree</i></li> <li>❖ <i>I strongly disagree</i></li> </ul> |
| <b>PART 7: KNOWLEDGE ON USE OF ANTIBIOTICS</b>                                                                                                                             |                                                                                                                                                                                                    |
| 29. <i>A 4-year-old child had diarrhoea in the last 4 days (3 stools daily). She had no fever during the past days nor at consultation. What is your treatment choice?</i> | <ul style="list-style-type: none"> <li>❖ <i>Amoxicillin orally</i></li> <li>❖ <i>Trimethoprim/sulphamethoxazole orally</i></li> <li>❖ <i>Amoxicillin/clavulanic acid orally</i></li> </ul>         |

|                                                                                                                                                                                                                                                                                                                                                                           |                                                                                                                                                                                                |
|---------------------------------------------------------------------------------------------------------------------------------------------------------------------------------------------------------------------------------------------------------------------------------------------------------------------------------------------------------------------------|------------------------------------------------------------------------------------------------------------------------------------------------------------------------------------------------|
|                                                                                                                                                                                                                                                                                                                                                                           | ❖ Oral rehydration salts with no antibiotic                                                                                                                                                    |
| 30. A 6-year-old child has fever (38°C), nasal discharge and a painful throat for two days. At visual inspection, the throat is reddish. What is your treatment choice?                                                                                                                                                                                                   | <ul style="list-style-type: none"> <li>❖ Trimethoprim/sulphamethoxazole orally</li> <li>❖ Amoxicillin orally</li> <li>❖ Amoxicillin/clavulanic acid orally</li> <li>❖ No antibiotic</li> </ul> |
| 31. During ward round, you have seen two patients with impaired renal function.<br>- Patient A is a 68-year-old male with cellulitis in the lower limb. He is administered clindamycin.<br>- Patient B is a 64-year-old woman with diabetes who received treatment for sepsis with ceftriaxone empirically.<br>In which case will you need to adjust the antibiotic dose? | <ul style="list-style-type: none"> <li>❖ Patient A</li> <li>❖ Patient B</li> <li>❖ Patient A &amp; B</li> <li>❖ Neither patient A nor patient B</li> </ul>                                     |
| 32. Which one of the following antibiotics may be safely given during the first trimester of pregnancy?                                                                                                                                                                                                                                                                   | <ul style="list-style-type: none"> <li>❖ Amoxicillin</li> <li>❖ Ciprofloxacin</li> <li>❖ Gentamicin</li> </ul>                                                                                 |
| 33. Which of the following antibiotics has the best activity against anaerobes?                                                                                                                                                                                                                                                                                           | <ul style="list-style-type: none"> <li>❖ Ciprofloxacin</li> <li>❖ Metronidazole</li> <li>❖ Trimethoprim/sulphamethoxazole</li> </ul>                                                           |
| 34. Methicillin resistant - <i>Staphylococcus aureus</i> is susceptible to:                                                                                                                                                                                                                                                                                               | <ul style="list-style-type: none"> <li>❖ Amoxicillin clavulanic acid</li> <li>❖ Cefotaxime</li> <li>❖ Ceftriaxone</li> <li>❖ None of these antibiotics</li> </ul>                              |
| 35. Which of the following antibiotics most effectively crosses the blood-brain barrier?                                                                                                                                                                                                                                                                                  | <ul style="list-style-type: none"> <li>❖ Clindamycin</li> <li>❖ Ceftriaxone</li> <li>❖ Vancomycin</li> </ul>                                                                                   |
| 36. Aminoglycoside antibiotics such as gentamicin are most active when they are administered as follows:                                                                                                                                                                                                                                                                  | <ul style="list-style-type: none"> <li>❖ Orally, three times daily</li> <li>❖ Parenterally, once daily</li> <li>❖ Parenterally, three times daily</li> </ul>                                   |

**Thank you very much for your kind and honest participation**
