# Supplementary material
Source: HighWire-hosted journal article supplement (https://bmjopen.bmj.com/content/10/3/e030823)
Supplement: inline-supplementary-material-2 [file inline-supplementary-material-2.pdf]

## Questionnaire to assess laboratory capacity for AMR testing.

| Objective: To assess capacity for Study sites laboratories to perform antimicrobial susceptibility testing and contribute to AMR surveillance |                                                                                                                                                                                                   |                |                        |
|-----------------------------------------------------------------------------------------------------------------------------------------------|---------------------------------------------------------------------------------------------------------------------------------------------------------------------------------------------------|----------------|------------------------|
| Laboratory infrastructure and equipment                                                                                                       |                                                                                                                                                                                                   |                | Additional Information |
| Q1                                                                                                                                            | Does your lab have capacity to carry out basic bacteriology (process stool, urine, urethral/ cervical swabs, and blood)? (Perform bacterial culture, identification, and susceptibility testing)? | Yes            |                        |
|                                                                                                                                               |                                                                                                                                                                                                   | Partial        |                        |
|                                                                                                                                               |                                                                                                                                                                                                   | No             |                        |
| Q2                                                                                                                                            | Does your lab have resources for basic aerobic bacterial culture?                                                                                                                                 | Yes            |                        |
|                                                                                                                                               |                                                                                                                                                                                                   | Partial        |                        |
|                                                                                                                                               |                                                                                                                                                                                                   | No             |                        |
| Q3                                                                                                                                            | Does your lab possess CO <sub>2</sub> incubators and CO <sub>2</sub> tank?                                                                                                                        | Yes            |                        |
|                                                                                                                                               |                                                                                                                                                                                                   | Partial        |                        |
|                                                                                                                                               |                                                                                                                                                                                                   | No             |                        |
| Q4                                                                                                                                            | Does your lab perform susceptibility testing by disc diffusion?                                                                                                                                   | Yes            |                        |
|                                                                                                                                               |                                                                                                                                                                                                   | Partial        |                        |
|                                                                                                                                               |                                                                                                                                                                                                   | No             |                        |
| Q5                                                                                                                                            | Please indicate the presence and status of the following in your lab                                                                                                                              | Present (Tick) | Functional (Tick)      |
|                                                                                                                                               | ❖ Petri dishes                                                                                                                                                                                    |                |                        |
|                                                                                                                                               | ❖ Swabs for surface application of cultures                                                                                                                                                       |                |                        |
|                                                                                                                                               | ❖ Standardized susceptibility testing discs                                                                                                                                                       |                |                        |
|                                                                                                                                               | ❖ control strains of known susceptibility patterns                                                                                                                                                |                |                        |
|                                                                                                                                               | ❖ Incubators                                                                                                                                                                                      |                |                        |
|                                                                                                                                               | ❖ Refrigerator                                                                                                                                                                                    |                |                        |
|                                                                                                                                               | ❖ Autostart backup for refrigerator/incubator                                                                                                                                                     |                |                        |
|                                                                                                                                               | ❖ Media preparation room                                                                                                                                                                          |                |                        |
|                                                                                                                                               | ❖ Autoclave                                                                                                                                                                                       |                |                        |
|                                                                                                                                               | ❖ Compound microscope                                                                                                                                                                             |                |                        |
|                                                                                                                                               | ❖ Weighing scale                                                                                                                                                                                  |                |                        |
|                                                                                                                                               | ❖ Biosafety cabinet Class 2                                                                                                                                                                       |                |                        |
|                                                                                                                                               | ❖ Candle jar                                                                                                                                                                                      |                |                        |
| ❖ pH meter                                                                                                                                    |                                                                                                                                                                                                   |                |                        |
| ❖ water distiller                                                                                                                             |                                                                                                                                                                                                   |                |                        |
| Q6                                                                                                                                            | Does your lab have automated system (Vitek) to conduct Antimicrobial Susceptibility Testing?                                                                                                      | Yes            |                        |
|                                                                                                                                               |                                                                                                                                                                                                   | Partial        |                        |
|                                                                                                                                               |                                                                                                                                                                                                   | No             |                        |

| USE OF STANDARDIZED METHODS                     |                                                                                                                                                                            |          | Additional Information |
|-------------------------------------------------|----------------------------------------------------------------------------------------------------------------------------------------------------------------------------|----------|------------------------|
| Q#                                              | Question                                                                                                                                                                   | Response |                        |
| Q7                                              | Does your laboratory use Clinical Laboratory Standards Institute (CLSI) guidelines?                                                                                        | Yes      |                        |
|                                                 |                                                                                                                                                                            | Partial  |                        |
|                                                 |                                                                                                                                                                            | No       |                        |
| Q8                                              | Does your laboratory use CLSI interpretation breakpoints?                                                                                                                  | Yes      |                        |
|                                                 |                                                                                                                                                                            | Partial  |                        |
|                                                 |                                                                                                                                                                            | No       |                        |
| Q9                                              | Does your laboratory select individual antibiotics following CLSI guidelines?                                                                                              | Yes      |                        |
|                                                 |                                                                                                                                                                            | Partial  |                        |
|                                                 |                                                                                                                                                                            | No       |                        |
| Q10                                             | Are single isolates or pure cultures only used for final performance of antimicrobial susceptibility testing?                                                              | Yes      |                        |
|                                                 |                                                                                                                                                                            | Partial  |                        |
|                                                 |                                                                                                                                                                            | No       |                        |
| Q11                                             | Is the inoculum size standardized using a turbidity standard (0.5 McFarland) or other acceptable method?                                                                   | Yes      |                        |
|                                                 |                                                                                                                                                                            | Partial  |                        |
|                                                 |                                                                                                                                                                            | No       |                        |
| Q12                                             | Does your lab have provision of standard microorganisms (ATCC) for internal quality control (useful in determining the potency of drugs or checking the quality of media)? | Yes      |                        |
|                                                 |                                                                                                                                                                            | Partial  |                        |
|                                                 |                                                                                                                                                                            | No       |                        |
| Q13                                             | For disk susceptibility tests, are zone sizes of controls measured and recorded?                                                                                           | Yes      |                        |
|                                                 |                                                                                                                                                                            | Partial  |                        |
|                                                 |                                                                                                                                                                            | No       |                        |
| Q14                                             | Are zone sizes of tests measured and used for recording sensitivity resistance?                                                                                            | Yes      |                        |
|                                                 |                                                                                                                                                                            | Partial  |                        |
|                                                 |                                                                                                                                                                            | No       |                        |
| Q15                                             | Does your lab use commercially prepared dehydrated AST media?                                                                                                              | Yes      |                        |
|                                                 |                                                                                                                                                                            | Partial  |                        |
|                                                 |                                                                                                                                                                            | No       |                        |
| Q16                                             | Does your lab perform Susceptibility Testing directly from specimen based on clinical information?                                                                         | Yes      |                        |
|                                                 |                                                                                                                                                                            | Partial  |                        |
|                                                 |                                                                                                                                                                            | No       |                        |
| Q17                                             | If direct susceptibility testing from specimen show mixed cultures, does your lab repeat susceptibility testing with isolated organisms?                                   | Yes      |                        |
|                                                 |                                                                                                                                                                            | Partial  |                        |
|                                                 |                                                                                                                                                                            | No       |                        |
| USE OF STANDARDIZED OPERATING PROCEDURES (SOPs) |                                                                                                                                                                            |          |                        |
| Q18                                             | For antimicrobial susceptibility testing systems, are there documented criteria in                                                                                         | Yes      |                        |

|                          |                                                                                                                                                                           |         |  |
|--------------------------|---------------------------------------------------------------------------------------------------------------------------------------------------------------------------|---------|--|
|                          | your institutions' SOPs for interpretation of the endpoint or zone size?                                                                                                  | Partial |  |
|                          |                                                                                                                                                                           | No      |  |
| Q19                      | Are guidelines established for the number and type of antibiotics reported for organisms isolated from different sites of infection?                                      | Yes     |  |
|                          |                                                                                                                                                                           | Partial |  |
|                          |                                                                                                                                                                           | No      |  |
| Q20                      | Do you report Antimicrobial Susceptibility Testing results based on Hospital policy (in consultation with Pharmacy, Infection control and Infectious diseases physicians. | Yes     |  |
|                          |                                                                                                                                                                           | Partial |  |
|                          |                                                                                                                                                                           | No      |  |
| <b>QUALITY ASSURANCE</b> |                                                                                                                                                                           |         |  |
| Q21                      | Is each new lot of susceptibility disks checked for activity before use?                                                                                                  | Yes     |  |
|                          |                                                                                                                                                                           | Partial |  |
|                          |                                                                                                                                                                           | No      |  |
| Q22                      | Does your lab use QC (quality control) strains to assess new lot of susceptibility discs?                                                                                 | Yes     |  |
|                          |                                                                                                                                                                           | Partial |  |
|                          |                                                                                                                                                                           | No      |  |
| Q23                      | Are tolerance limits for potency of antimicrobials established (criteria for "out of control")?                                                                           | Yes     |  |
|                          |                                                                                                                                                                           | Partial |  |
|                          |                                                                                                                                                                           | No      |  |
| Q24                      | Does your laboratory procedure manual address unusual or inconsistent antimicrobial testing results?                                                                      | Yes     |  |
|                          |                                                                                                                                                                           | Partial |  |
|                          |                                                                                                                                                                           | No      |  |
| Q25                      | Does your lab participate in any Antimicrobial Susceptibility Testing related internal quality assurance program?                                                         | Yes     |  |
|                          |                                                                                                                                                                           | Partial |  |
|                          |                                                                                                                                                                           | No      |  |
| Q26                      | Does your lab participate in any Antimicrobial Susceptibility Testing related external quality assurance program?                                                         | Yes     |  |
|                          |                                                                                                                                                                           | Partial |  |
|                          |                                                                                                                                                                           | No      |  |
| Q27                      | Are out of control results reported to supervisory personnel?                                                                                                             | Yes     |  |
|                          |                                                                                                                                                                           | Partial |  |
|                          |                                                                                                                                                                           | No      |  |

| <b>READINESS FOR AMR SURVEILLANCE</b>  |                                                                                                                                           |         |  |
|----------------------------------------|-------------------------------------------------------------------------------------------------------------------------------------------|---------|--|
| Q28                                    | Does your lab participate in antimicrobial resistance surveillance?                                                                       | Yes     |  |
|                                        |                                                                                                                                           | Partial |  |
|                                        |                                                                                                                                           | No      |  |
| Q29                                    | Does your lab generate on routine basis antibiogram for purpose of monitoring the resistant and sensitivity patterns in your institution? | Yes     |  |
|                                        |                                                                                                                                           | Partial |  |
|                                        |                                                                                                                                           | No      |  |
| Q30                                    | Does your lab conduct all Antimicrobial Susceptibility Testing or forwards it to other labs?                                              | Yes     |  |
|                                        |                                                                                                                                           | Partial |  |
|                                        |                                                                                                                                           | No      |  |
| Q31                                    | Does your lab receive samples for Antimicrobial Susceptibility Testing from other labs?                                                   | Yes     |  |
|                                        |                                                                                                                                           | Partial |  |
|                                        |                                                                                                                                           | No      |  |
| Q32                                    | Is Antimicrobial Susceptibility Testing cumulative data collected manually?                                                               | Yes     |  |
|                                        |                                                                                                                                           | Partial |  |
|                                        |                                                                                                                                           | No      |  |
| Q33                                    | Is Antimicrobial Susceptibility Testing cumulative data collected automatically using lab information system (LIS)?                       | Yes     |  |
|                                        |                                                                                                                                           | Partial |  |
|                                        |                                                                                                                                           | No      |  |
| <b>DETECTION OF SPECIFIC ORGANISMS</b> |                                                                                                                                           |         |  |
| Q34                                    | Does your laboratory have the capacity of identifying resistance genotypes or resistant bacterial clones?                                 | Yes     |  |
|                                        |                                                                                                                                           | Partial |  |
|                                        |                                                                                                                                           | No      |  |
| <b>EQUIPMENT MAINTENANCE</b>           |                                                                                                                                           |         |  |
| Q35                                    | Are Antimicrobial Susceptibility Testing equipment maintained appropriately and calibrated?                                               | Yes     |  |
|                                        |                                                                                                                                           | Partial |  |
|                                        |                                                                                                                                           | No      |  |
| Q36                                    | Does your lab monitor incubator temperatures on a daily basis?                                                                            | Yes     |  |
|                                        |                                                                                                                                           | Partial |  |
|                                        |                                                                                                                                           | No      |  |
| <b>CONTINUING MEDICAL EDUCATION</b>    |                                                                                                                                           |         |  |
| Q37                                    | <b>How often do you receive training in Bacteriology?</b>                                                                                 | Yes     |  |
|                                        |                                                                                                                                           | Partial |  |
|                                        |                                                                                                                                           | No      |  |
| Q38                                    | How often are you trained in conducting Antimicrobial Susceptibility Testing?                                                             |         |  |

| <b>STAFFING</b>    |                                                                                                                              |         |  |
|--------------------|------------------------------------------------------------------------------------------------------------------------------|---------|--|
| Q39                | How many laboratory technologists are in the station?                                                                        |         |  |
| Q40                | How many microbiologists are in the station?                                                                                 |         |  |
| Q41                | Does your laboratory have staff with Bachelor's degree qualification or higher?                                              | Yes     |  |
|                    |                                                                                                                              | Partial |  |
|                    |                                                                                                                              | No      |  |
| Q42                | Do you engage a Consultant clinical microbiologist(s)?                                                                       | Yes     |  |
|                    |                                                                                                                              | Partial |  |
|                    |                                                                                                                              | No      |  |
| <b>CONSUMABLES</b> |                                                                                                                              |         |  |
| Q43                | How often do you experience unavailability of consumables in Microbiology section? Eg Lack of biochemical reagents and media | Yes     |  |
|                    |                                                                                                                              | Partial |  |
|                    |                                                                                                                              | No      |  |
| Q44                | Does your lab experience delays in Antimicrobial Susceptibility Testing due to lack of reagents?                             | Yes     |  |
|                    |                                                                                                                              | Partial |  |
|                    |                                                                                                                              | No      |  |
| Q45                | Do frequent stock outs lead to low demand of cultures by clinicians?                                                         | Yes     |  |
|                    |                                                                                                                              | Partial |  |
|                    |                                                                                                                              | No      |  |
| <b>BIOSAFETY</b>   |                                                                                                                              |         |  |
| Q46                | Does your lab autoclave/incinerate cultures prior to discard?                                                                | Yes     |  |
|                    |                                                                                                                              | Partial |  |
|                    |                                                                                                                              | No      |  |
| Q47                | Do you have handwashing facility in the laboratory?                                                                          | Yes     |  |
|                    |                                                                                                                              | Partial |  |
|                    |                                                                                                                              | No      |  |
| Q48                | Does your lab get continuous supply of running water?                                                                        | Yes     |  |
|                    |                                                                                                                              | Partial |  |
|                    |                                                                                                                              | No      |  |
| Q49                | Does your lab have soap supply in the handwash facility?                                                                     | Yes     |  |
|                    |                                                                                                                              | Partial |  |
|                    |                                                                                                                              | No      |  |
